# Supplementary material for: A three-dimensional heterocluster containing manganese clusters and hexanuclear sodium wheels
Source: Royal Society of Chemistry journal article supplement (doi:10.1039/b707476j), 2007-01-01
Supplement: b707476j.pdf [file b707476j.pdf]

## Supporting Information

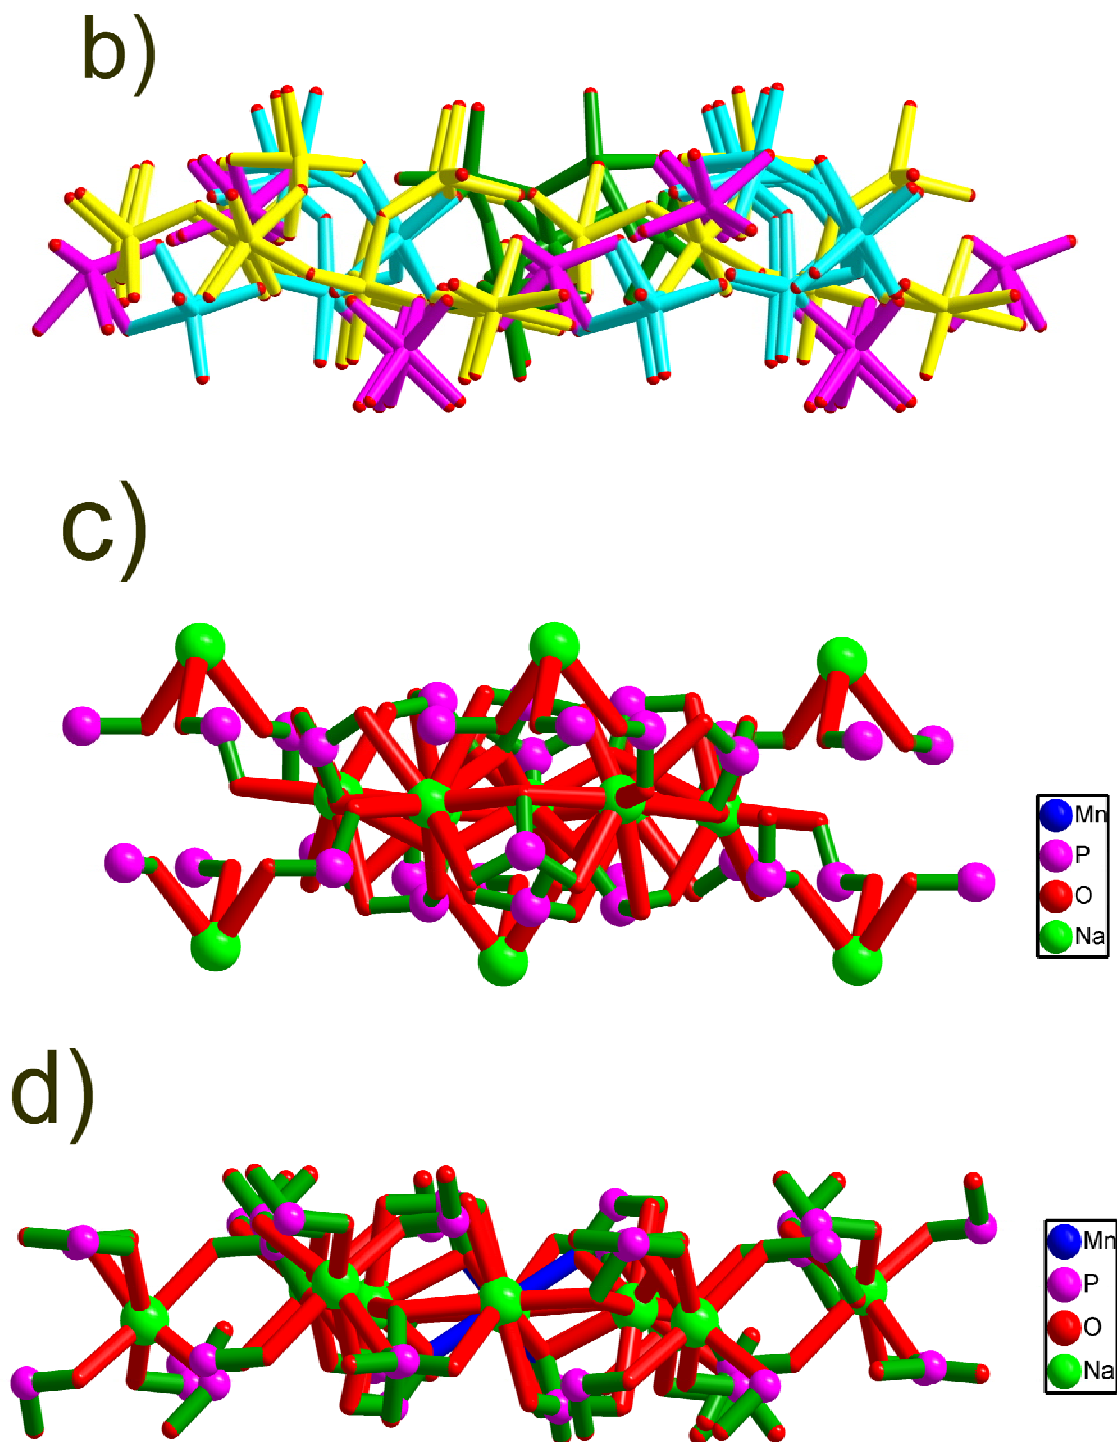

**Figure S1.** The side view of the building blocks of **1**, and the number of the pictures are in accord with Figure 1 in the article. (b) The aggregation mode of the Mn-chains, showing the same type of connection nodes (pink) are in a nearly linear array, at the same time all of them are in a zigzag array. (c) A side view of the  $\{\text{Na}(1)[\text{Na}(4)]_6\text{P}_{18}\}$  unit. (d) A side view of the  $\{\text{Mn}(10)[\text{Na}(5)]_6\text{P}_{12}\}$  unit.

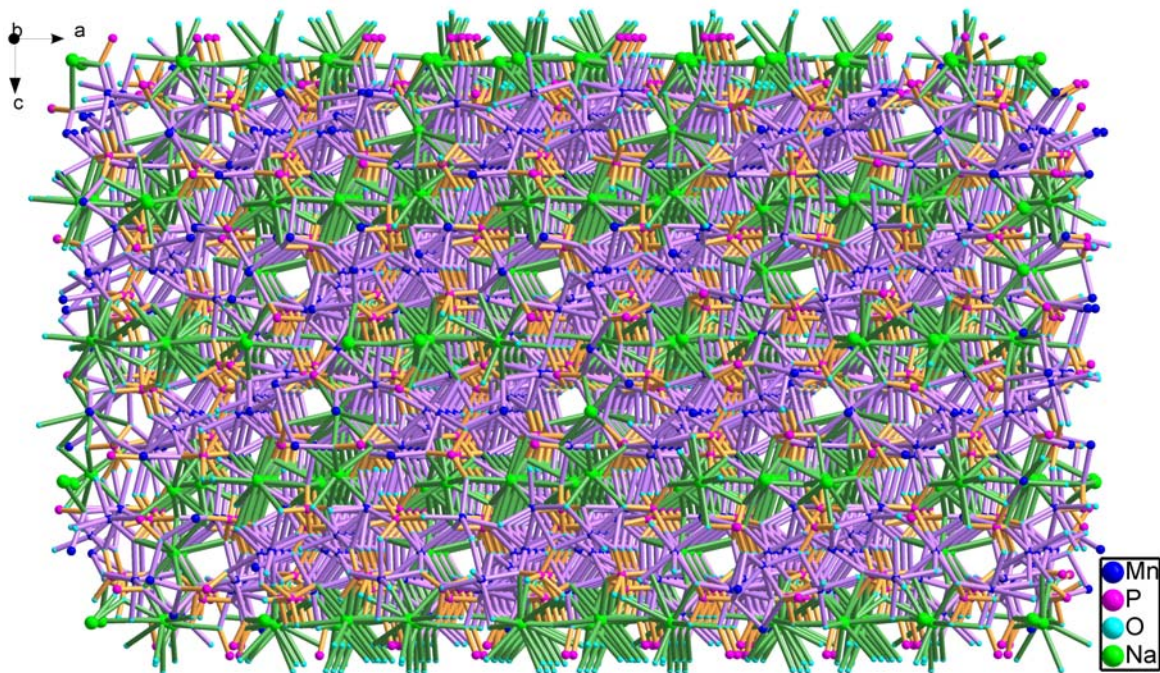

**Figure S2.** The 3D network of the heterocluster  $[\text{Na}_{17}\text{Mn}_{43}(\text{PO}_4)_{36}]^{5-}$ . Color code: Na-O: dark green; P-O: orange; M-O: purple.

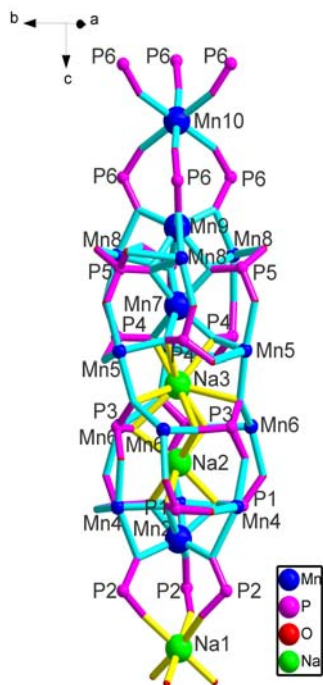

**Figure S3.** View of the connection mode of the linkers (P<sub>1-6</sub>, Na(2)-Na(3) group), the wheel centers (Na(1), Mn(10)) and the connection nodes (Mn(2), Mn(7), Mn(9)) of the manganese clusters.
